# Supplementary material for: Improved myocardial performance in infarcted rat heart by injection of disulfide-cross-linked chitosan hydrogels loaded with basic fibroblast growth factor
Source: Royal Society of Chemistry journal article supplement (doi:10.1039/d1tb01961a), 2021-12-15
Supplement: d1tb01961a1.pdf [file d1tb01961a1.pdf]

1

## Supporting Information

2 **Improved myocardial performance in infarcted rat heart by injection of**  
3 **disulfide-cross-linked chitosan hydrogels loaded with basic fibroblast growth**  
4 **factor**

5 Bo Fu<sup>†1,2</sup>, Xiaobei Wang<sup>†3</sup>, Zhengda Chen<sup>†1,2</sup>, Nan Jiang<sup>\*1</sup>, Zhigang Guo<sup>\*1</sup>, Yuhui  
6 Zhang<sup>1</sup>, Shaopeng Zhang<sup>1</sup>, Xiankun Liu<sup>1</sup>, Li Liu<sup>\*4</sup>

7

8 1. Department of Cardiovascular Surgery, Tianjin Chest Hospital, Tianjin 300051, P.  
9 R. China;

10 2. Tianjin Medical University, Tianjin 300203, P. R. China;

11 3. Department of Materials Engineering, North China Institute of Aerospace  
12 Engineering, Langfang 065000, P. R. China;

13 4. Institute of Polymer Chemistry, College of Chemistry, Nankai University, Tianjin  
14 300071, P. R. China.

15

16 **<sup>1</sup>H NMR spectrum of the CMCS/BSA hydrogel**

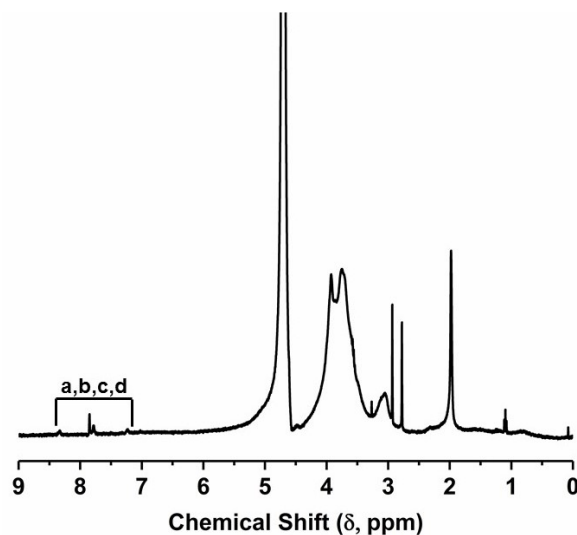

17

18 **Figure S1.** <sup>1</sup>H NMR spectrum of the CMCS/BSA hydrogel in D<sub>2</sub>O.

19 **2. Swelling test**

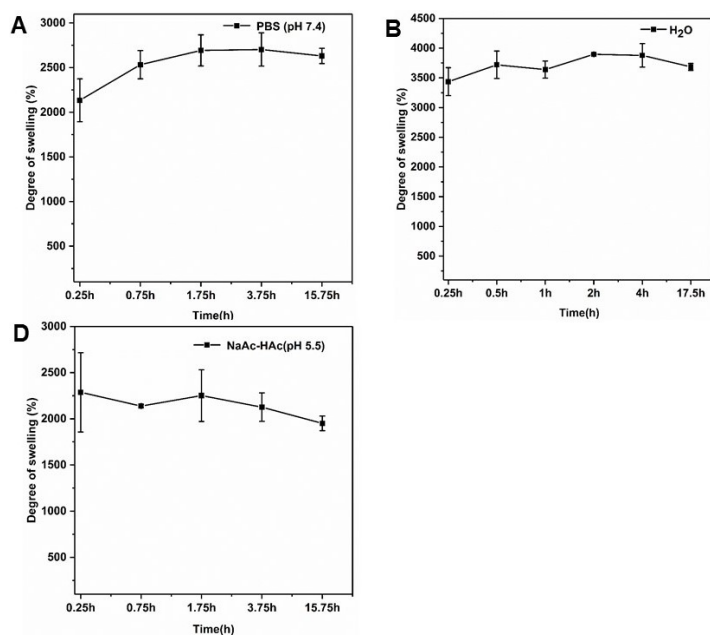

20

21 **Figure S2.** Swelling properties of the CMCS/BSA hydrogels under different solutions.

22 **3. Phase angle analysis of the CMCS/BSA hydrogels**

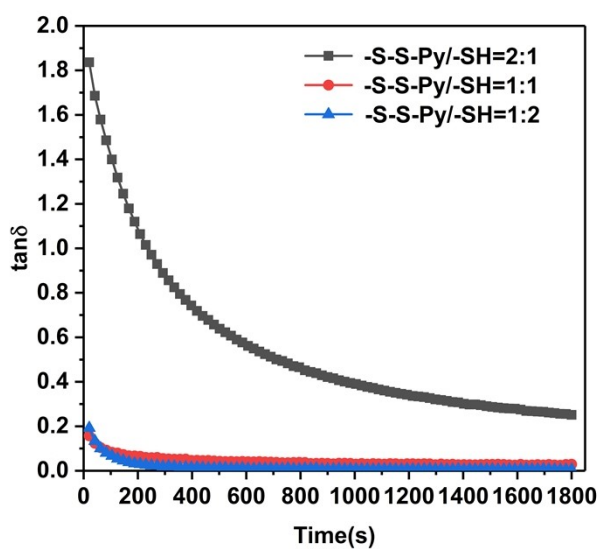

23

24 **Figure S3.** Phase angle analysis of the CMCS/BSA hydrogels with different -S-S-Py/-SH molar

25 ratio through dynamic time sweep tests at 37 °C.
